# Supplementary material for: Highly fluorescent organic nanoparticles of thiacyanine dye: A synergetic effect of intermolecular H-aggregation and restricted intramolecular rotation
Source: Royal Society of Chemistry journal article supplement (doi:10.1039/c1ra00497b), 2011-01-01
Supplement: c1ra00497b.pdf [file c1ra00497b.pdf]

## SUPPLEMENTARY INFORMATION

# Highly fluorescent organic nanoparticles of thiacyanine dye: A synergetic effect of intermolecular H-aggregation and restricted intramolecular rotation

Hiroshi Yao\* and Koji Ashiba

*Graduate School of Material Science, University of Hyogo, 3-2-1 Koto, Kamigori-cho, Ako-gun, Hyogo  
678-1297, Japan*

**IR spectrum of the solid-state precipitates of TC–TFPB prepared at the  $\rho = 1$  along with those of pure Na–TFPB and TC–Cl**

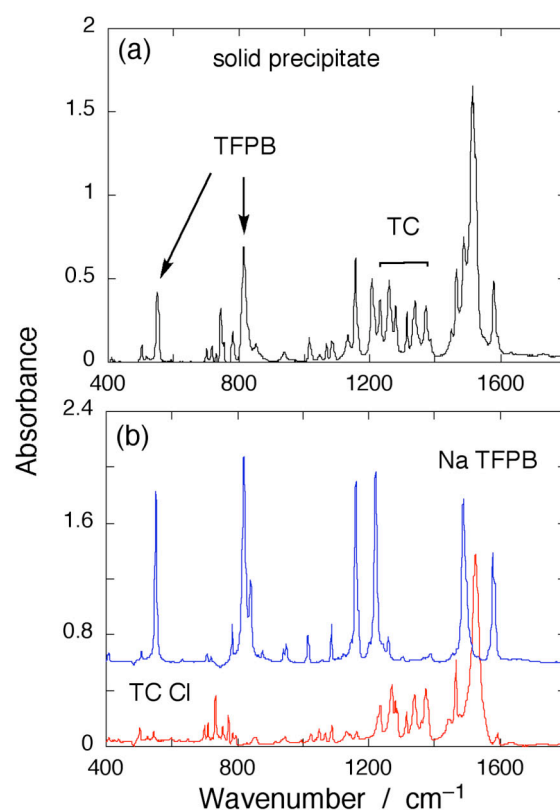

**Figure S1.** (a) FT-IR spectrum of the solid precipitate produced after mixing aqueous TC–Cl solution with aqueous Na–TFPB solution at  $\rho = 1$  in the absence of PVP. (b) FT-IR spectra of pure Na–TFPB and TC–Cl.

Figure S1 shows the FT-IR spectra of the reactants Na-TFPB and TC-Cl along with that of the ion-pair product TC-TFPB (precipitate). The spectra (KBr pellet) were measured on a Horiba FT-720. Judging from these spectral features, we can know that the solid-state TC-TFPB is reasonably composed of the respective components; that is, TC and TFPB.

### **Polarized-light microscopy (PLM) for the solid precipitates of TC-TFPB**

To check whether the solid-state product TC-TFPB is crystalline or amorphous, polarized-light microscopy (PLM) is effective since structural anisotropy displays birefringence with contrast-enhancing imaging. Figure S2 shows typical optical micrographs of the precipitates without (upper image) and with (lower image) cross polarizers. Then PLM was performed with a BXP optical microscope (Olympus). If the specimen is optically anisotropic or crystalline, we can visualize the object with PLM observations; however, from Figure S2, the complete absence of the PLM image indicates that the solid product of TC-TFPB is amorphous.

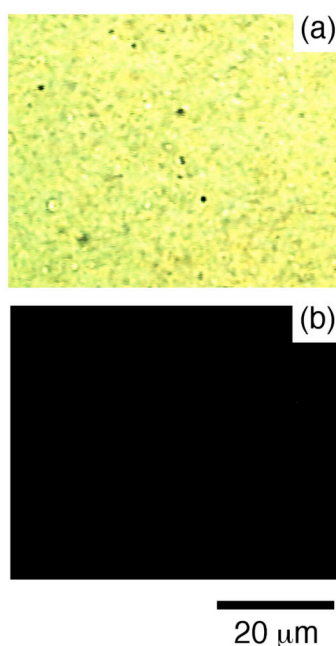

**Figure S2.** Representative optical micrographs of the solid-state products of TC-TFPB dispersed in water. (a) and (b) correspond to those observed without and with cross polarizers, respectively.
